# Supplementary material for: Evolutionary and structural annotation of disease-associated mutations in human aminoacyl-tRNA synthetases
Source: PubMed Central journal article supplement (PMC4298046; doi:10.1186/1471-2164-15-1063), 2014-12-04
Supplement: 12864_2014_6929_MOESM1_ESM.pdf [file 12864_2014_6929_MOESM1_ESM.pdf]

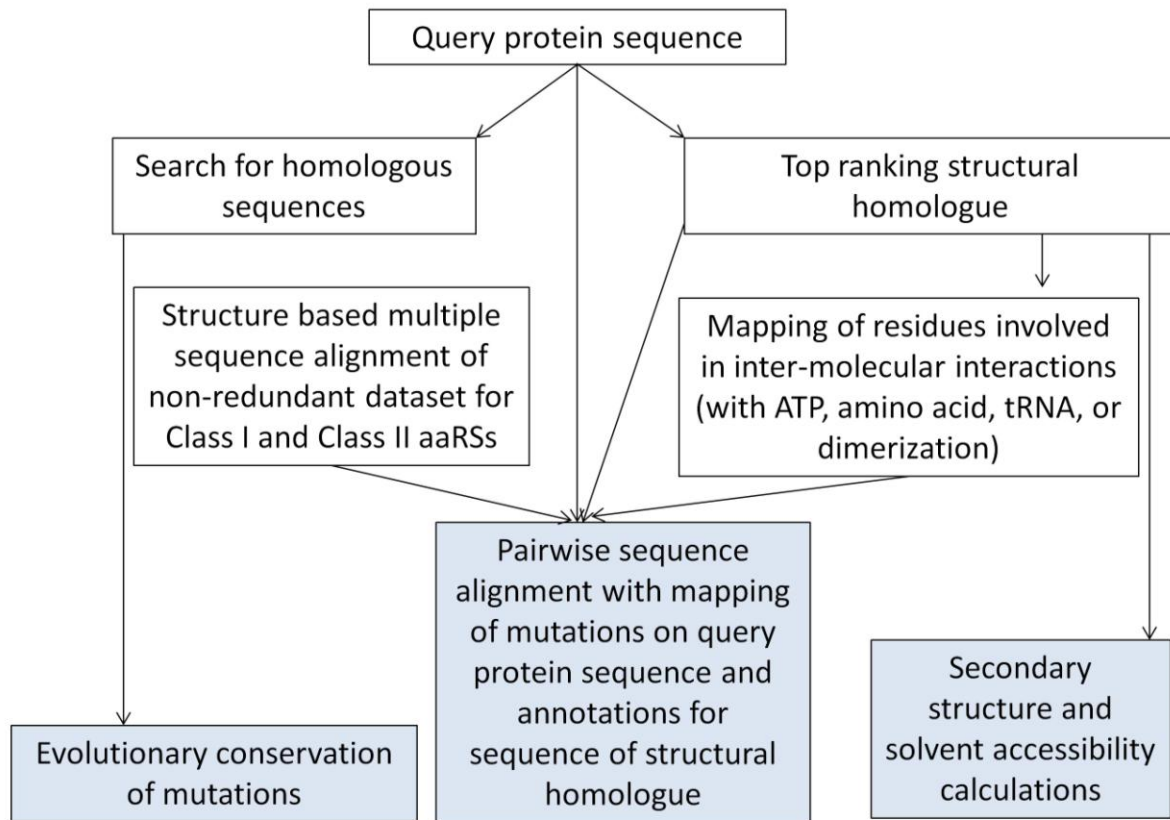

Figure S1: Outline for the mutational annotation pipeline.
